# Supplementary material for: NFIA Haploinsufficiency Is Associated with a CNS Malformation Syndrome and Urinary Tract Defects
Source: PubMed Central journal article supplement (PMC1877820; doi:10.1371/journal.pgen.0030080), 2007-05-25
Supplement: pgen.0030080.sg002.pdf [file pgen.0030080.sg002.pdf]

**Figure S2.** *In situ* hybridization of mouse *C20orf32*

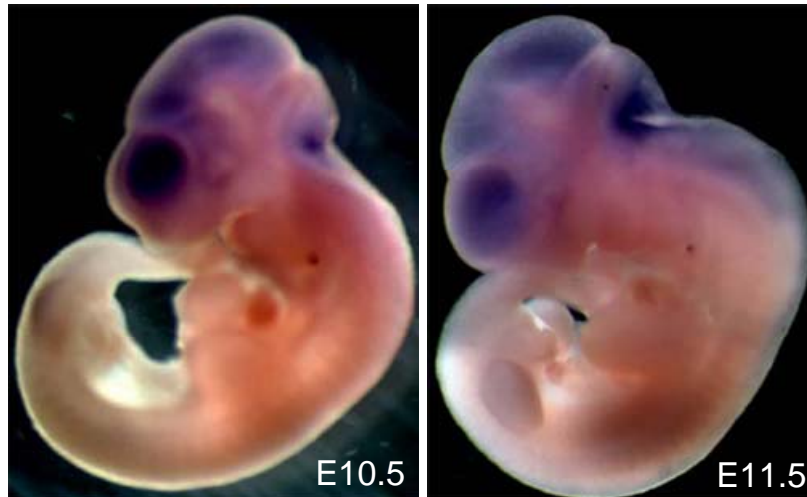

*C20orf32* is not expressed in the mouse embryonic spinal cord and kidney at E10.5 and E11.5.
