# Supplementary material for: NFIA Haploinsufficiency Is Associated with a CNS Malformation Syndrome and Urinary Tract Defects
Source: PubMed Central journal article supplement (PMC1877820; doi:10.1371/journal.pgen.0030080), 2007-05-25
Supplement: pgen.0030080.sg004.pdf [file pgen.0030080.sg004.pdf]

**Figure S4. Array Comparative Genomic Hybridization (aCGH) for DGAP174**

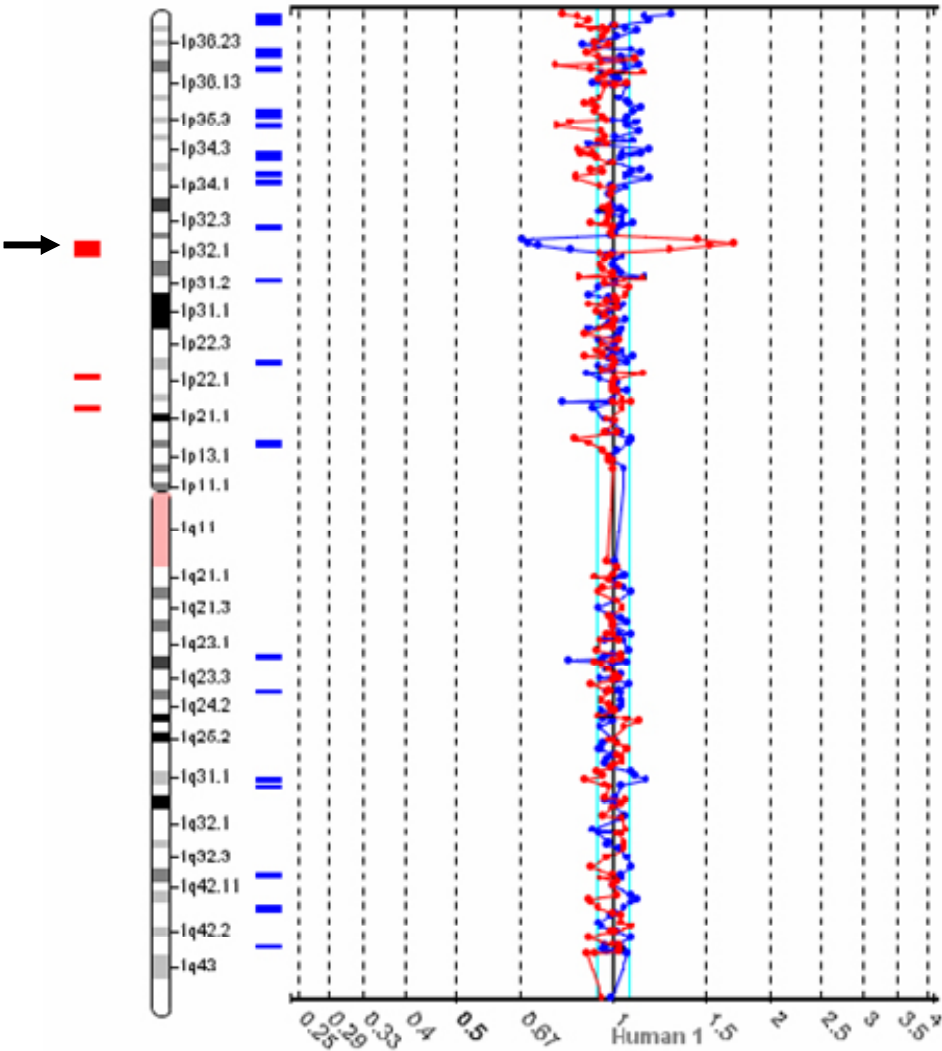

Array CGH at a 1-Mb resolution defines the deletion interval in DGAP174. Spectral Genomics profile indicates the deletion interval (arrow) on 1p from 1p32.1 to 1p31.3.
