# Supplementary material for: NFIA Haploinsufficiency Is Associated with a CNS Malformation Syndrome and Urinary Tract Defects
Source: PubMed Central journal article supplement (PMC1877820; doi:10.1371/journal.pgen.0030080), 2007-05-25
Supplement: pgen.0030080.sg005.pdf [file pgen.0030080.sg005.pdf]

**Figure S5.** Northern blot analysis of *NFIA* in different regions of the human brain

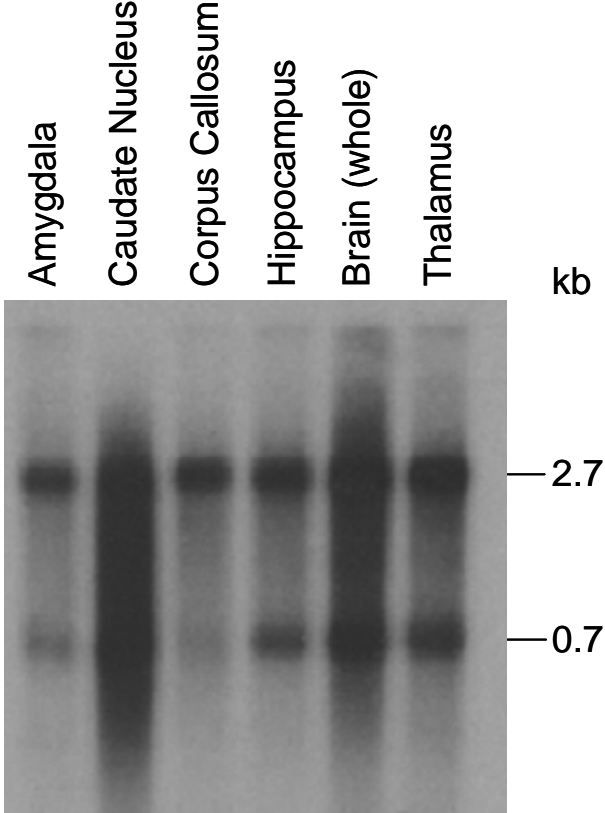

Northern blot of multiple human brain tissues was hybridized with a probe containing *NFIA* exons 2-6.
