# Supplementary material for: NFIA Haploinsufficiency Is Associated with a CNS Malformation Syndrome and Urinary Tract Defects
Source: PubMed Central journal article supplement (PMC1877820; doi:10.1371/journal.pgen.0030080), 2007-05-25
Supplement: pgen.0030080.sg006.pdf [file pgen.0030080.sg006.pdf]

Figure S6. Hydronephrosis in P16 *Nfia*<sup>-/-</sup> mutant

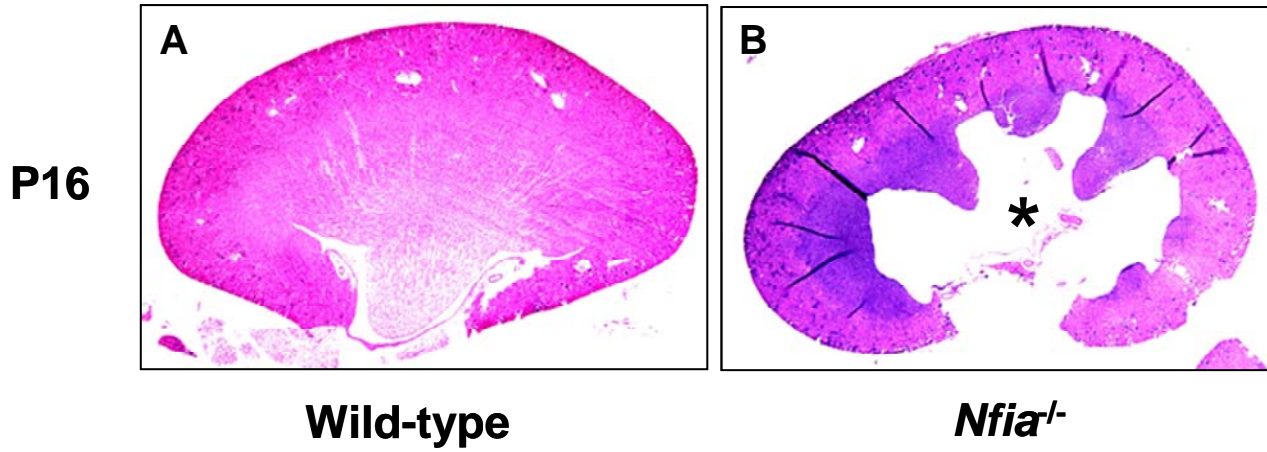

Severe hydronephrosis (\* in B) is shown in a P16 *Nfia*<sup>-/-</sup> mutant kidney, whereas the kidney in its wild-type littermate (A) is normal.
